# Supplementary material for: Transfer of the Experimental Autoimmune Glaucoma Model from Rats to Mice—New Options to Study Glaucoma Disease
Source: MDPI journal article supplement (doi:10.3390/ijms20102563), 2019-05-24
Supplement: s1 [file s1]

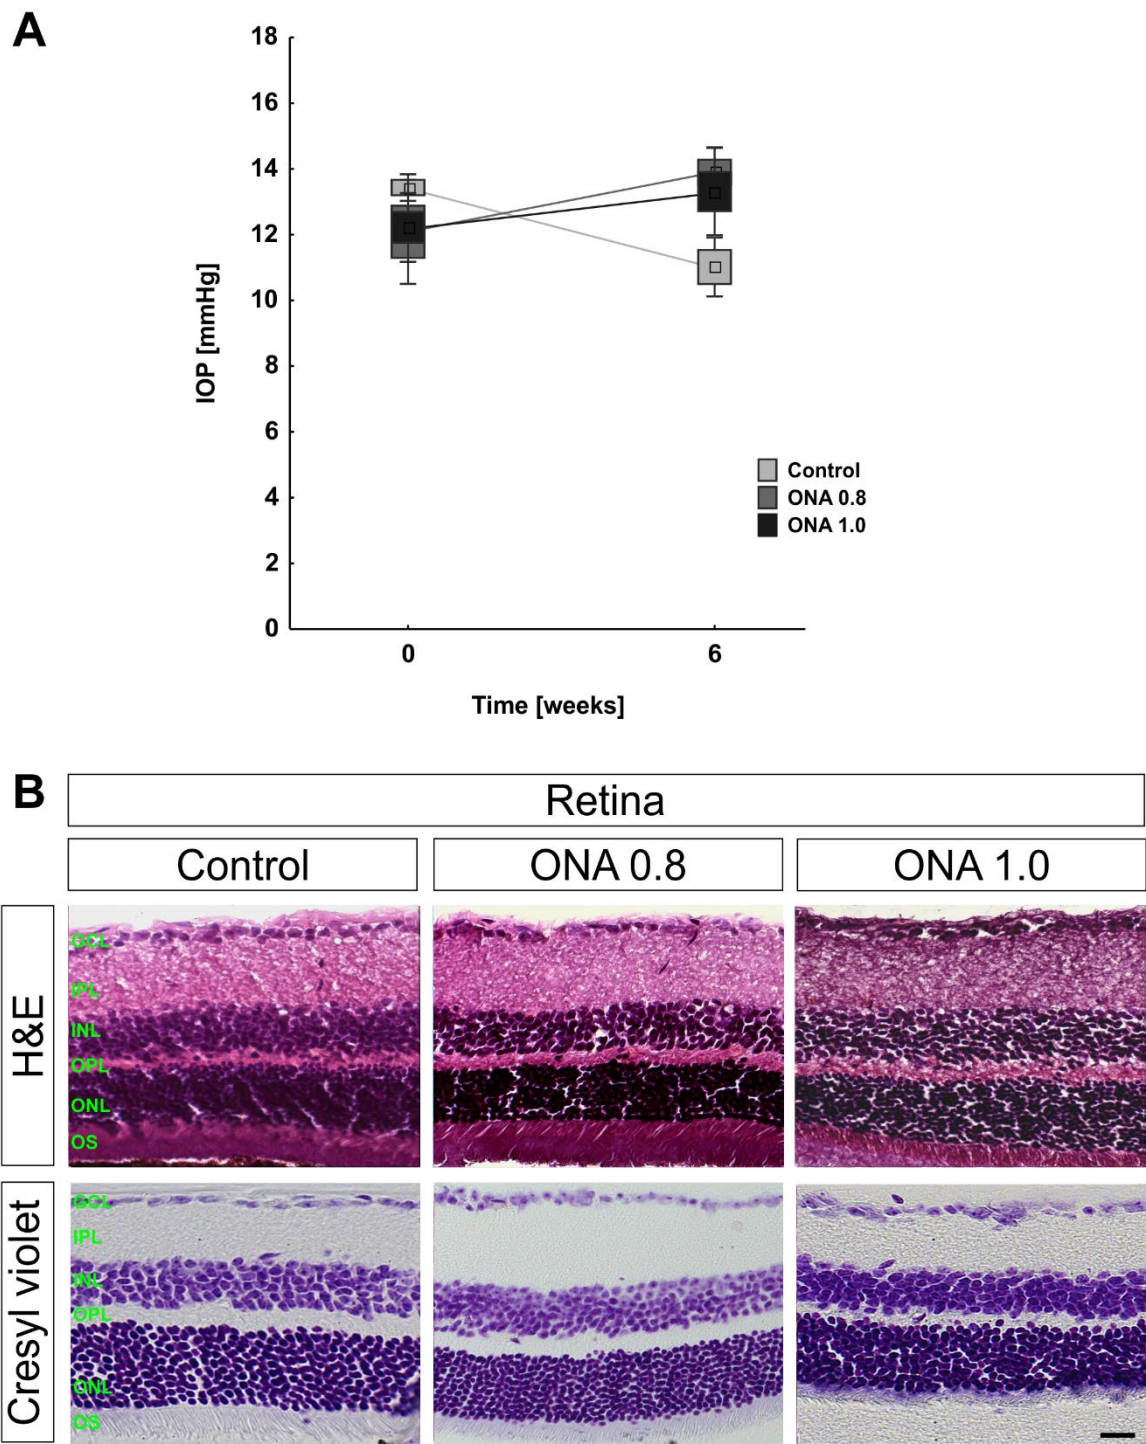

**Supplement Figure S1: IOP in normal range.** (A) IOP was measured before and 6 weeks after immunization. No changes could be observed within all groups at both points in time ( $p>0.05$ ). (B) Retinal cross-sections were stained with H&E and cresyl violet. Retinas of the immunized groups showed no infiltrations or signs of inflammation. Also, the retinal structure was intact and comparable with the control retinas. Abbreviations: GCL=ganglion cell layer, IPL=inner plexiform layer, INL=inner nuclear layer, OPL=outer plexiform layer, ONL=outer nuclear layer, OS=outer segment. Values are mean $\pm$ SEM $\pm$ SD. Scale bar: 20  $\mu$ m.
